# Supplementary material
Source: ML conference proceedings conference paper supplement (https://openreview.net/forum?id=uuCcK4cmlH)
Supplement: supplementary_material [file attachment]

## A APPENDIX A

### A.1 GENERAL PROMPT AND REASONING TRACE OF IDS-AGENT

The general prompt of the IDS-Agent is illustrated in Figure 3. The process begins with instructing the IDS-Agent to load network traffic data and perform feature preprocessing. Afterward, we utilize a range of classifiers to analyze the data. To enhance decision-making, the IDS-Agent retrieves prior successful examples from its knowledge base for comparison. In cases where discrepancies arise between the predictions of different models, we prompt the IDS-Agent to consult internal or external knowledge bases for additional insights to resolve the conflict. Finally, the IDS-Agent consolidates the findings and presents the result in a structured JSON format. Figure 4 provides an example of the reasoning trace produced by the IDS-Agent during this process.

**General Prompt:**

You are a helpful assistant that can implement multi-step tasks, such as intrusion detection. I will give you the traffic features, you are asked to classify it using tools. The final output must be in a JSON format according to the classifier results. You should plan first such as:

1. Load the traffic features from the CSV file. You can use the `load_data_line` tool to obtain the complete traffic.
2. Preprocessing the feature. This can be done using the `data_preprocessing` tool. Input the traffic in the original format.
3. load classifiers for classification. This can be done using the classifier tool. You can use multiple classifiers. The tool params include a classifier name, which must be one from `{model_names}` and the preprocessed features.
4. Retrieve previous successful reasonings to help you predict. This can be done using the `memory_retrieve` tool with the classifier's names and their classification results as input.
5. When there are discrepancies/disagreements for different models, you can search from vector database/google/wiki to get more information about the difference of attacks to help you make decisions.
6. At the end, you should summarize the results from these classifiers and provide a final result. Summarize the classification with Balance sensitivity, which means balancing the false alarm rate and the missing alarm rate. The predicted label should be the original format of classifier prediction. The final output format **must** be:

Final Answer:

```
```json
{ 'line_number': \line_number,
  'analysis': str, \here is the Analysis,
  'predicted_label_top_1': str,
  'predicted_label_top_2': str,
  'predicted_label_top_3': str,
}```
```

**User Input:**

Now, classify the traffic from file name {file\_name} with index {line\_number}

Figure 3: General prompt and user input

### A.2 ADDITIONAL CASE STUDIES

The cases in Figure 5 and Figure 6 highlight the enhanced reasoning ability of IDS-Agent with the knowledge retriever. It is shown that IDS-Agent not only considers the top-1 predictions but also the second and third predictions and their confidences. Moreover, in these examples, when the models have discrepancies in the predictions, the IDS-Agent automatically accesses external databases to extract additional knowledge, aiding in feature analysis and supporting its final decision. By leveraging these external knowledge sources, the IDS-Agent gains a deeper understanding of complex attack patterns and anomalies, enhancing both accuracy and decision-making. This dynamic capability allows the IDS-Agent to better adapt to new or evolving threats in the IoT environment.

### A.3 THE PERFORMANCE OF DIFFERENT ML CLASSIFIERS

Table 6 shows the F-score of different ML classifiers on the ACI-IoT’23 dataset as well as our method. Among the six classifiers, MLP achieves the highest F-score of 0.96. The IDS-Agent outperforms all six classifiers and the majority vote method. Moreover, we achieve a high F-score on the UDP Flood attack, while the majority method only has an F-score of 0.55.

Table 7 shows the F-score of different ML classifiers on the CIC-IoT’23 dataset as well as our method. Among the six classifiers, Random Forest achieves the highest F-score of 0.75. For the IDS-Agent, we use the GPT-4o as the core LLM. It is shown that our attack achieved a higher F-score compared with the majority vote classifier. Moreover, we achieved a higher F-score on the

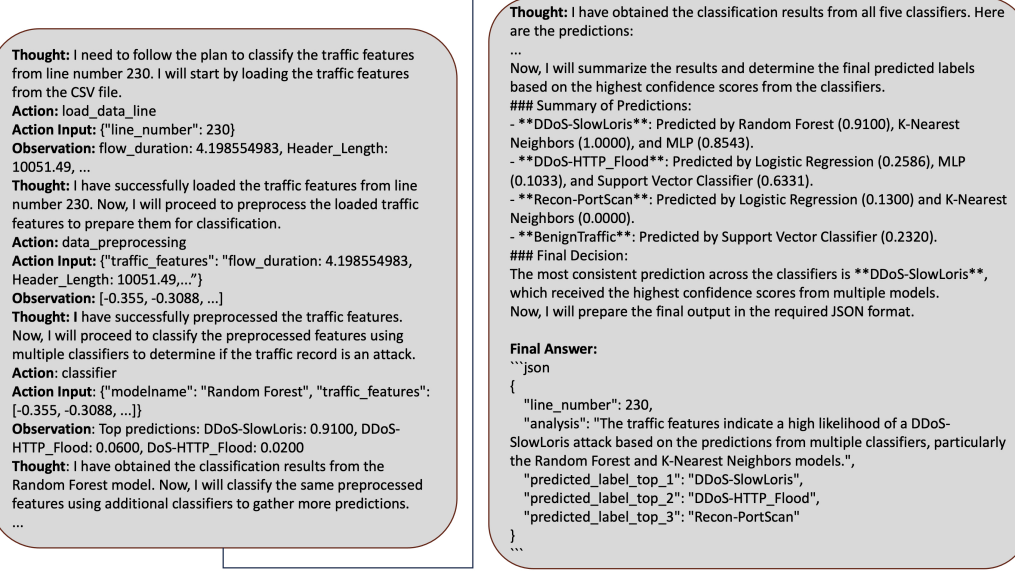

Figure 4: An example of the reasoning trace and final answer.

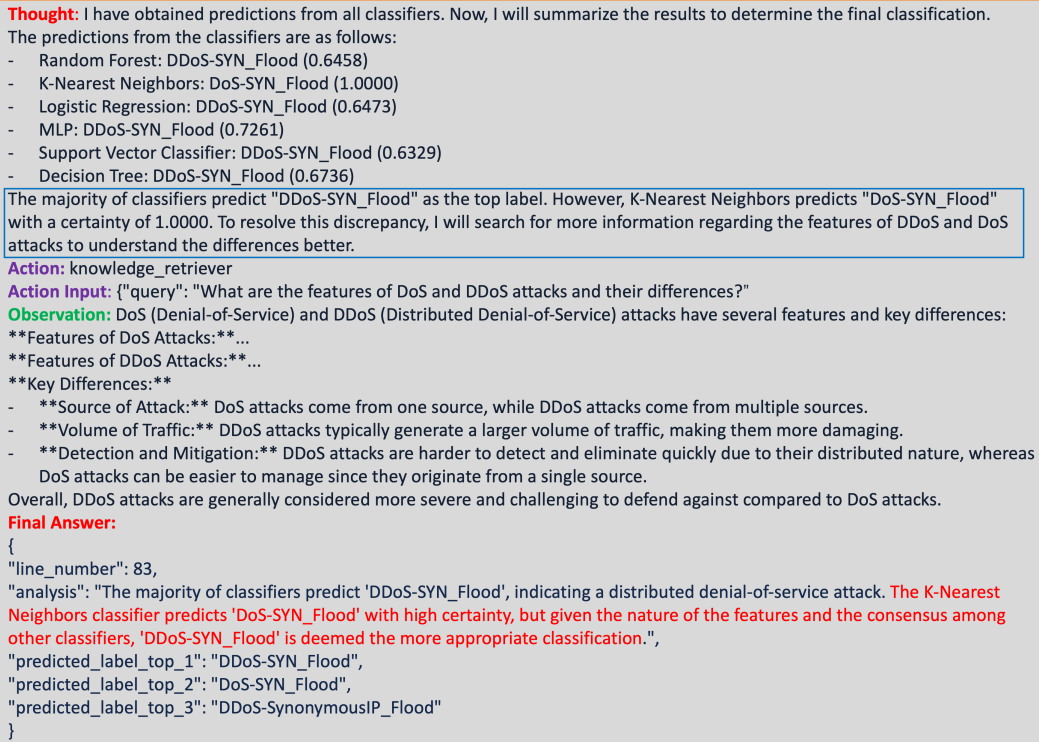

Figure 5: Additional case study on the DDoS attacks of the IDS-Agent. From the final analysis, it is shown that the IDS-Agent not only considers the predicted labels but also considers the confidence of different classifiers.

benign traffic compared with six classifiers and the majority vote method, which means our method has a lower false alarm rate, which is an important metric for intrusion detection. Figure 7 shows the confusion matrix of the majority voting classifier and IDS-Agent.

Table 6: The F-score of different ML classifiers on the ACI-IoT’23 dataset. For the IDS-Agent, we use the GPT-4o as the core LLM.

| Model              | RF          | LR          | KNN         | MLP         | DT          | SVC         | Majority Vote | IDS-Agent   |
|--------------------|-------------|-------------|-------------|-------------|-------------|-------------|---------------|-------------|
| Benign             | 0.90        | 0.59        | 0.91        | 0.91        | 0.91        | 0.80        | 0.91          | 0.91        |
| DNS Flood          | 0.95        | 0.10        | 0.80        | 0.95        | 0.91        | 0.91        | 1.00          | 0.95        |
| Dictionary Attack  | 1.00        | 0.71        | 0.98        | 0.95        | 1.00        | 0.92        | 1.00          | 1.00        |
| ICMP Flood         | 1.00        | 0.98        | 0.98        | 1.00        | 0.95        | 0.98        | 0.98          | 0.98        |
| OS Scan            | 1.00        | 1.00        | 1.00        | 1.00        | 1.00        | 1.00        | 1.00          | 1.00        |
| Ping Sweep         | 0.98        | 0.98        | 0.97        | 0.98        | 0.97        | 0.98        | 1.00          | 1.00        |
| Port Scan          | 1.00        | 1.00        | 1.00        | 1.00        | 1.00        | 1.00        | 1.00          | 1.00        |
| SYN Flood          | 1.00        | 1.00        | 1.00        | 1.00        | 0.98        | 1.00        | 1.00          | 1.00        |
| Slowloris          | 1.00        | 0.43        | 1.00        | 1.00        | 1.00        | 0.97        | 1.00          | 1.00        |
| UDP Flood          | 0.60        | 0.00        | 0.45        | 0.74        | 0.50        | 0.00        | 0.55          | 0.80        |
| Vulnerability Scan | 1.00        | 1.00        | 1.00        | 1.00        | 1.00        | 1.00        | 1.00          | 1.00        |
| <b>Macro Avg</b>   | <b>0.95</b> | <b>0.71</b> | <b>0.92</b> | <b>0.96</b> | <b>0.93</b> | <b>0.87</b> | <b>0.96</b>   | <b>0.97</b> |

Table 7: The F-score of different ML classifiers on the CIC-IoT’23 dataset. For the IDS-Agent, we use the GPT-4o as the core LLM.

| Model                   | DT          | KNN         | LR          | MLP         | RF          | SVC         | Majority Vote | IDS-Agent   |
|-------------------------|-------------|-------------|-------------|-------------|-------------|-------------|---------------|-------------|
| BenignTraffic           | 0.79        | 0.77        | 0.79        | 0.75        | 0.75        | 0.73        | 0.74          | 0.84        |
| DDoS-ACK_Fragmentation  | 0.98        | 0.95        | 0.95        | 0.93        | 0.95        | 0.98        | 0.95          | 1.00        |
| DDoS-HTTP_Flood         | 0.58        | 0.53        | 0.24        | 0.79        | 0.68        | 0.38        | 0.69          | 0.70        |
| DDoS-ICMP_Flood         | 0.98        | 0.95        | 0.98        | 0.95        | 1.00        | 1.00        | 1.00          | 1.00        |
| DDoS-ICMP_Fragmentation | 1.00        | 1.00        | 1.00        | 1.00        | 1.00        | 1.00        | 1.00          | 1.00        |
| DDoS-PSHACK_Flood       | 1.00        | 1.00        | 0.98        | 1.00        | 1.00        | 1.00        | 1.00          | 0.95        |
| DDoS-RSTFINFlood        | 1.00        | 1.00        | 1.00        | 1.00        | 1.00        | 1.00        | 1.00          | 1.00        |
| DDoS-SYN_Flood          | 0.72        | 0.08        | 0.63        | 0.73        | 0.76        | 0.64        | 0.75          | 0.75        |
| DDoS-SlowLoris          | 0.76        | 0.74        | 0.00        | 0.89        | 0.79        | 0.44        | 0.79          | 0.82        |
| DDoS-SynonymousIP_Flood | 0.70        | 0.74        | 0.70        | 0.72        | 0.74        | 0.65        | 0.74          | 0.78        |
| DDoS-TCP_Flood          | 0.69        | 0.08        | 0.66        | 0.67        | 0.69        | 0.67        | 0.67          | 0.71        |
| DDoS-UDP_Flood          | 0.71        | 0.23        | 0.77        | 0.75        | 0.71        | 0.74        | 0.71          | 0.74        |
| DDoS-UDP_Fragmentation  | 0.97        | 0.95        | 0.95        | 0.97        | 0.97        | 0.97        | 0.97          | 0.95        |
| DoS-HTTP_Flood          | 0.65        | 0.79        | 0.73        | 0.85        | 0.76        | 0.89        | 0.83          | 0.84        |
| DoS-SYN_Flood           | 0.62        | 0.57        | 0.31        | 0.72        | 0.76        | 0.37        | 0.72          | 0.80        |
| DoS-TCP_Flood           | 0.32        | 0.60        | 0.00        | 0.00        | 0.32        | 0.00        | 0.17          | 0.33        |
| DoS-UDP_Flood           | 0.53        | 0.65        | 0.55        | 0.52        | 0.48        | 0.46        | 0.48          | 0.46        |
| MITM-ArpSpoofing        | 0.54        | 0.58        | 0.09        | 0.60        | 0.58        | 0.58        | 0.62          | 0.67        |
| Mirai-greeth_flood      | 0.95        | 0.98        | 0.90        | 0.97        | 0.97        | 1.00        | 0.97          | 0.95        |
| Mirai-greip_flood       | 0.98        | 0.97        | 0.89        | 0.98        | 0.98        | 1.00        | 0.98          | 0.95        |
| Mirai-udpplain          | 0.95        | 0.98        | 1.00        | 0.98        | 0.98        | 1.00        | 0.98          | 1.00        |
| Recon-HostDiscovery     | 0.54        | 0.45        | 0.40        | 0.48        | 0.55        | 0.39        | 0.47          | 0.53        |
| Recon-OSScan            | 0.30        | 0.30        | 0.08        | 0.00        | 0.15        | 0.10        | 0.17          | 0.15        |
| Recon-PortScan          | 0.41        | 0.36        | 0.24        | 0.31        | 0.44        | 0.31        | 0.37          | 0.31        |
| <b>Macro Avg</b>        | <b>0.74</b> | <b>0.68</b> | <b>0.62</b> | <b>0.73</b> | <b>0.75</b> | <b>0.68</b> | <b>0.70</b>   | <b>0.75</b> |

**Thought:** I have obtained the predictions from multiple classifiers. Here are the results:

1. **\*\*Random Forest\*\***: - **MITM-ArpSpoofing**: 0.4200 - BenignTraffic: 0.2500 - Recon-PortScan: 0.1300
2. **\*\*K-Nearest Neighbors\*\***: - **Recon-PortScan**: 0.4000 - MITM-ArpSpoofing: 0.4000 - BenignTraffic: 0.2000
3. **\*\*Logistic Regression\*\***: - **BenignTraffic**: 0.3689 - MITM-ArpSpoofing: 0.3105 - DoS-UDP\_Flood: 0.1391
4. **\*\*MLP\*\***: - **MITM-ArpSpoofing**: 0.4019 - BenignTraffic: 0.3296 - Recon-HostDiscovery: 0.1095
5. **\*\*Support Vector Classifier\*\***: - **BenignTraffic**: 0.6327 - MITM-ArpSpoofing: 0.2328 - Recon-HostDiscovery: 0.0855
6. **\*\*Decision Tree\*\***: - **Recon-OSScan**: 1.0000 - Recon-PortScan: 0.0000 - DDoS-UDP\_Flood: 0.0000

Now, I will analyze the results to determine the final classification. The predictions show a mix of benign and attack classifications, with some classifiers leaning towards "MITM-ArpSpoofing" and others towards "BenignTraffic." The Decision Tree classifier is particularly confident in classifying it as "Recon-OSScan." To resolve the discrepancies, I will search for more information regarding the features of the attacks and benign traffic to make a more informed decision.

**Action:** knowledge\_retriever

**Action Input:** {"query": "what is the features of MITM-ArpSpoofing and how to detect it"}

**Observation:** The features of MITM-ARP-Spoofing include: 1. **\*\*Interception of Communication\*\***: The attacker positions themselves between two network devices, allowing them to intercept and potentially modify the data being transmitted.

2. **\*\*ARP Cache Poisoning\*\***: The attacker sends falsified ARP messages to both devices, associating their MAC address with the IP address of the other device, thus redirecting traffic through their machine....

**Final Answer:**

```
{
  "line_number": 83,
  "analysis": "The traffic features indicate a potential MITM-ArpSpoofing attack based on the predictions from multiple classifiers, particularly Random Forest and MLP. The Decision Tree classifier also suggests a reconnaissance attack, but the overall consensus leans towards MITM.",
  "predicted_label_top_1": "MITM-ArpSpoofing",
  "predicted_label_top_2": "BenignTraffic",
  "predicted_label_top_3": "Recon-PortScan",
}
```

Figure 6: Additional case study on the MITM attacks of the IDS-Agent. From the final analysis, it is shown that the IDS-Agent not only considers the top 1 prediction but also considers the second and third predictions.

#### A.4 DETAILS FOR SENSITIVITY CUSTOMIZATION

We adjust the detection sensitivity by prompting the core LLM with "Summarize the classification with {sensitivity} sensitivity, {sensitivity details}". Here, 'sensitivity details' will be 'discover the attack as the priority', 'balance the false alarm rate and the missing alarm rate', and 'do not alert unless you are very sure', for 'sensitivity' being 'aggressive', 'balanced' and 'conservative'. The detection performances of IDS-Agent for different detection sensitivities are shown in Table 8. It is shown that the 'Aggressive' command achieves a higher recall on the attacks while the 'Conservative' command achieves a higher recall on the benign examples. The classification results, detailed in Table 8 of the appendix, show that the IDS-Agent effectively follows these sensitivity instructions without requiring expert intervention or additional tuning.

Table 8: The classification results of different detection sensitivities.

| Sensitivity        | Aggressive  |             |             | Balance     |             |             | Conservative |             |             |
|--------------------|-------------|-------------|-------------|-------------|-------------|-------------|--------------|-------------|-------------|
| Metrics            | Precision   | Recall      | F1-score    | Precision   | Recall      | F1-score    | Precision    | Recall      | F1-score    |
| Benign             | 0.96        | 0.90        | 0.92        | 0.87        | 0.96        | 0.91        | 0.60         | 0.98        | 0.75        |
| DNS Flood          | 0.91        | 1.00        | 0.95        | 0.91        | 1.00        | 0.95        | 0.94         | 0.80        | 0.86        |
| Dictionary Attack  | 0.91        | 1.00        | 0.95        | 1.00        | 1.00        | 1.00        | 1.00         | 0.65        | 0.79        |
| ICMP Flood         | 0.95        | 1.00        | 0.89        | 0.95        | 1.00        | 0.98        | 0.95         | 1.00        | 0.98        |
| OS Scan            | 1.00        | 1.00        | 1.00        | 1.00        | 1.00        | 1.00        | 1.00         | 1.00        | 1.00        |
| Ping Sweep         | 0.95        | 1.00        | 0.98        | 1.00        | 1.00        | 1.00        | 1.00         | 1.00        | 1.00        |
| Port Scan          | 1.00        | 1.00        | 1.00        | 1.00        | 1.00        | 1.00        | 1.00         | 1.00        | 1.00        |
| SYN Flood          | 1.00        | 1.00        | 1.00        | 1.00        | 1.00        | 1.00        | 1.00         | 1.00        | 1.00        |
| Slowloris          | 0.95        | 1.00        | 0.98        | 1.00        | 1.00        | 1.00        | 1.00         | 0.40        | 0.57        |
| UDP Flood          | 1.00        | 0.80        | 0.89        | 1.00        | 0.53        | 0.69        | 1.00         | 0.47        | 0.64        |
| Vulnerability Scan | 1.00        | 1.00        | 1.00        | 1.00        | 1.00        | 1.00        | 1.00         | 1.00        | 1.00        |
| <b>Macro Avg</b>   | <b>0.97</b> | <b>0.97</b> | <b>0.97</b> | <b>0.98</b> | <b>0.95</b> | <b>0.96</b> | <b>0.95</b>  | <b>0.85</b> | <b>0.87</b> |

#### A.5 THE ZERO-DAY ATTACK DETECTION DETAILS

We prompt GPT-4o to classify an example as an unknown attack if multiple classifiers output low confidence for their top predictions or if there are conflicting predictions among different classifiers.

This is based on our observation that, for unknown attacks, machine learning models typically exhibit relatively low confidence levels, as shown in Figure 8. Specifically, we instruct the LLM to consider an example as a potential unknown attack if more than two models have low confidence (e.g., below a threshold of 0.7). Moreover, if more than two models have low confidence or if different models produce significantly divergent predictions, we direct `IDS-Agent` to search the knowledge base for characteristics of the most probable predicted attacks. If the traffic features do not match these attack characteristics, we confirm the example as an unknown attack and provide this as the final output.

#### A.6 THE INFLUENCE OF HYPERPARAMETERS

To assess the influence of different values of  $\lambda_1$  and  $\lambda_2$  in Eq. 1, we conducted experiments by varying these parameters and measuring the impact on retrieval effectiveness and overall classification performance. Table 9 summarizes the results of our experiments. The experimental results indicate that both recency and content similarity are crucial for effective LTM retrieval. A balanced approach, where  $\lambda_1$  and  $\lambda_2$  are equal, provides the best performance, suggesting that the agent benefits from considering both embedding similarity and recency.

Table 9: Performance metrics for different values of  $\lambda_1$  and  $\lambda_2$ .

| $\lambda_1$ | $\lambda_2$ | Accuracy (%) | Precision (%) | Recall (%)  |
|-------------|-------------|--------------|---------------|-------------|
| 0.1         | 0.9         | 97.2         | 97.2          | 96.5        |
| 0.5         | 0.5         | <b>98.0</b>  | <b>98.2</b>   | <b>97.2</b> |
| 0.9         | 0.1         | 97.3         | 97.1          | 96.1        |

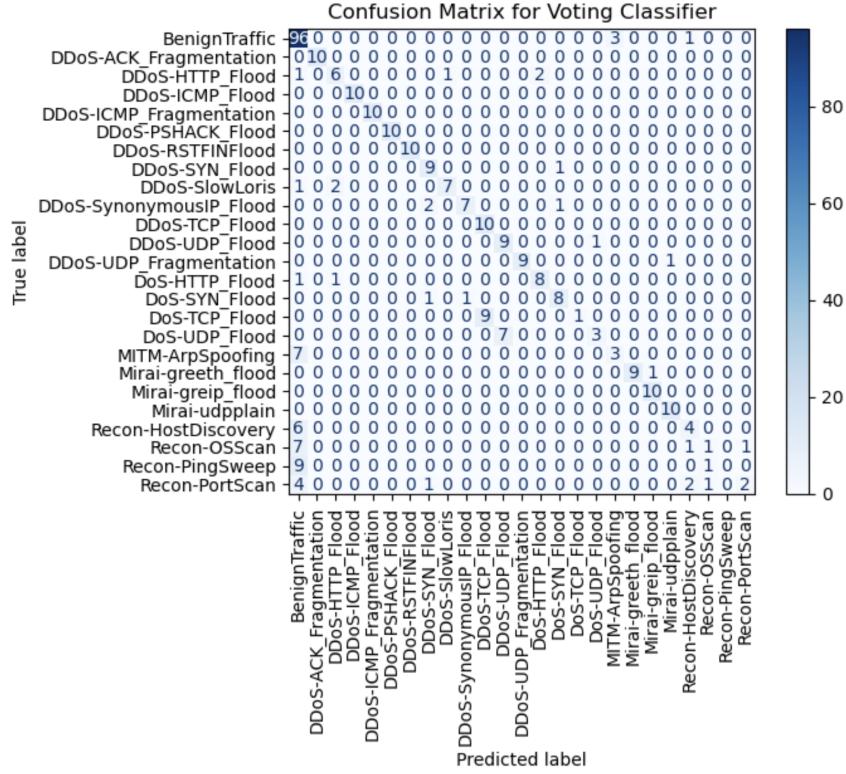

(a) Confusion matrix of majority voting classifier

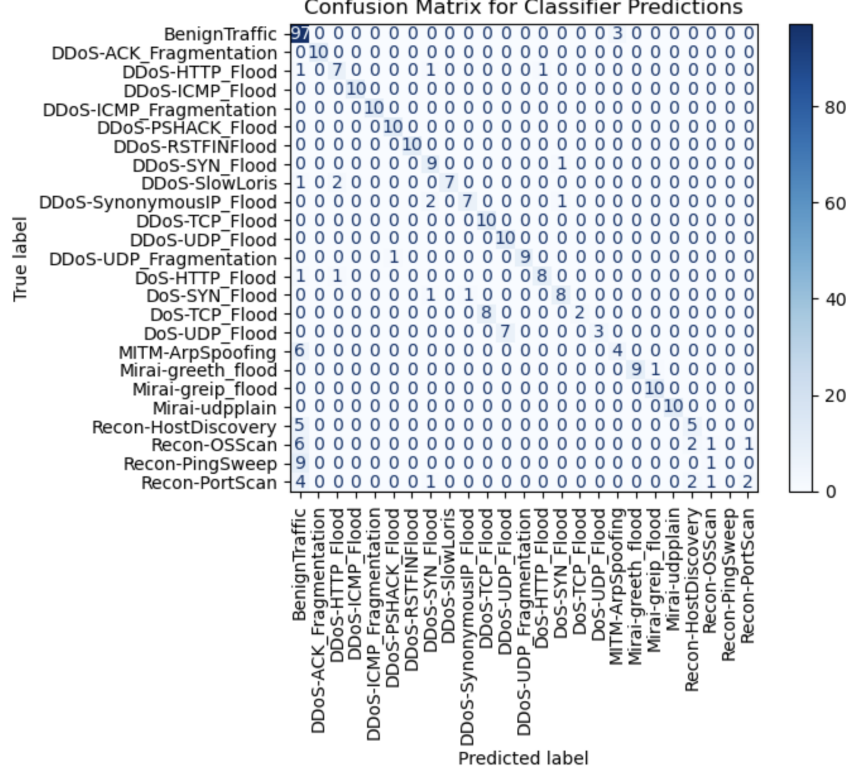

(b) Confusion matrix of IDS-Agent

Figure 7: The confusion matrix of majority voting classifier and IDS-Agent on the CIC-IoT'23 dataset.



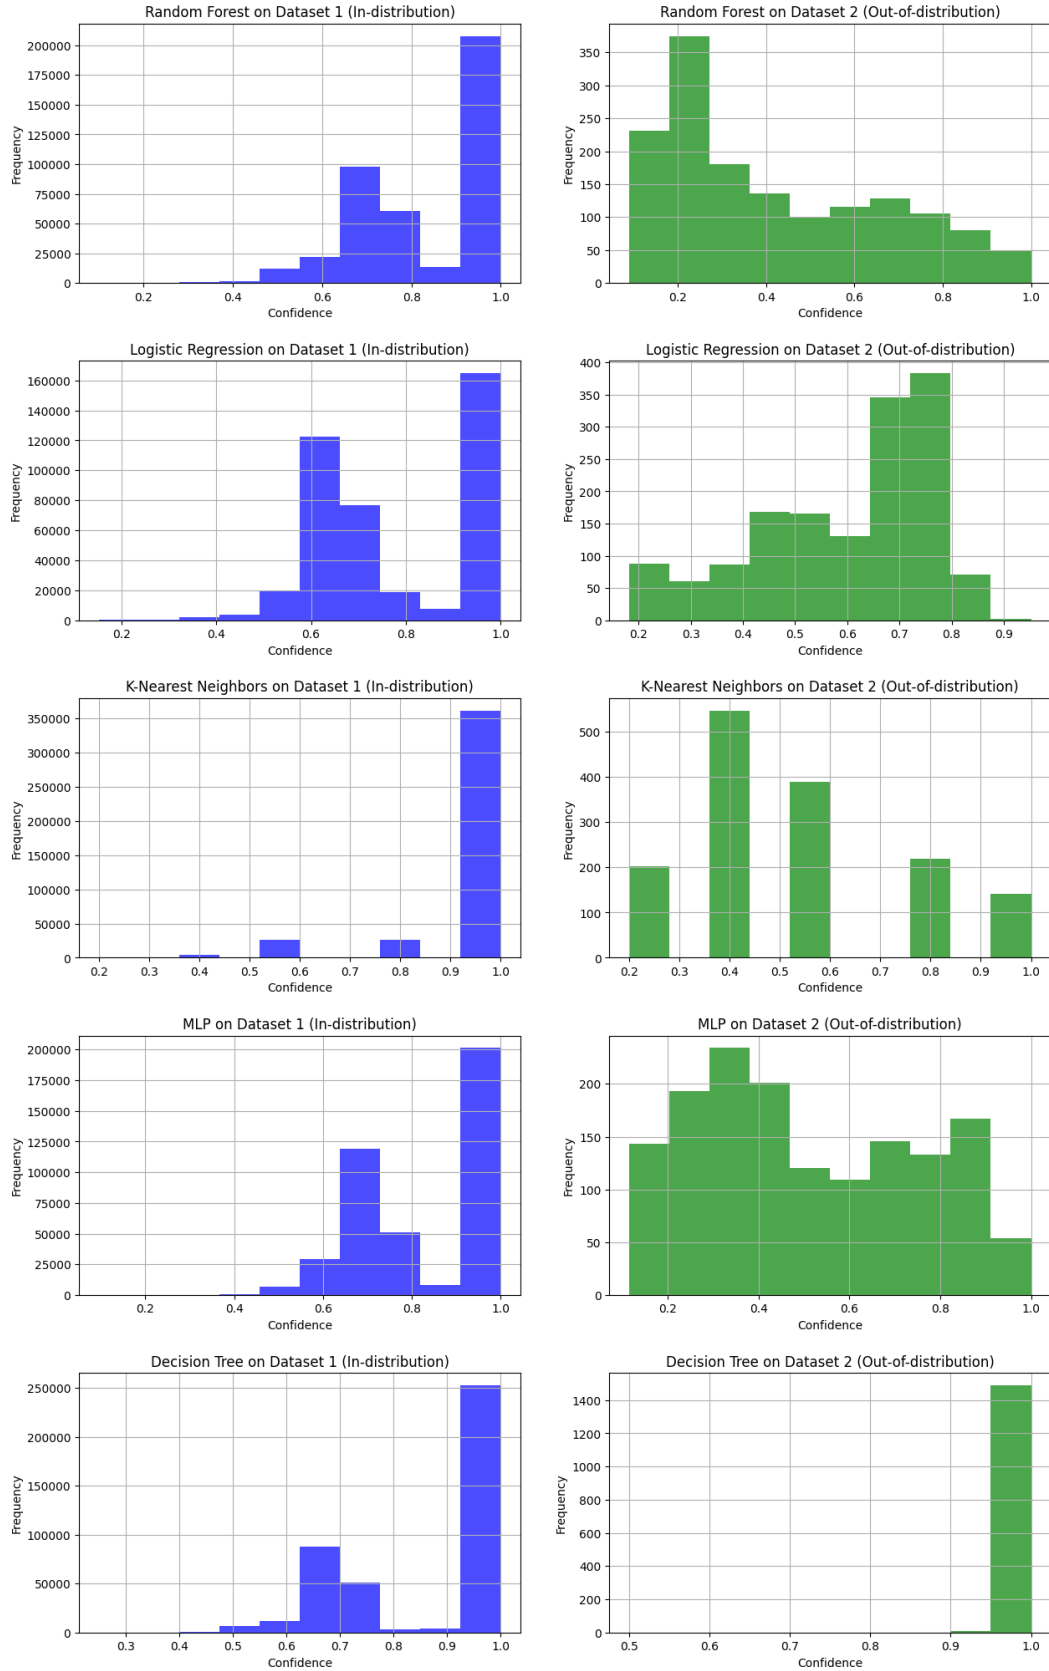

Figure 8: The confidence distributions of difference classifiers on the in-distribution dataset and out-of-distribution dataset.
